# Supplementary material
Source: PubMed Central journal article supplement (PMC7238333)
Supplement: NIHMS1535603-supplement-1535603_Supp_Tab1-6.pdf [file NIHMS1535603-supplement-1535603_Supp_Tab1-6.pdf]

### Patch Classification Measures

- 1 patch volume
- 2 patch surface area
- 3 patch perimeter
- 4 patch radius
- 5 patch closure surface area
- 6 patch volume / (patch closure surface area)<sup>3/2</sup>
- 7 patch surface area / patch closure surface area
- 8 patch radius / (patch surface area)<sup>1/2</sup>
- 9 patch surface area / (patch perimeter)<sup>2</sup>
- 10 patch variation from a sphere
- 11 patch shape diameter function
- 12 maximum mean curvature on patch
- 13 average of mean curvature on patch
- 14 standard deviation of mean curvature on patch
- 15 average Gaussian curvature on patch
- 16 average of mean curvature on patch edge
- 17 |patch closure center – average patch position|
- 18 |weighted average patch position – average patch position| / patch radius
- 19 |patch closure center – average patch position| / patch radius
- 20 |patch closure center – weighted average patch position| / patch radius
- 21 cell volume
- 22 cell surface area
- 23 patch count

#### Supplementary Table 1

Geometric patch features used for SVM-based patch classification.

### Patch Merging Measures

- 1 average of the mean curvature at the interface between the two patches
- 2 average of the Gaussian curvature at the interface
- 3 average of the mean curvature at the interface – the average curvature of the two patches
- 4 maximum of the mean curvature at the interface
- 5 maximum of the mean curvature at the interface – the maximum curvature of the two patches
- 6 standard deviation of the mean curvature at the interface
- 7 standard deviation of the Gaussian curvature at the interface
- 8 fraction of mean curvature at the interface that is above 80th percentile for the cell
- 9 fraction of mean curvature at the interface that is below 20th percentile for the cell
- 10 fraction of mean curvature at the interface that is above 80th percentile for the two patches
- 11 fraction of mean curvature at the interface that is below 20th percentile for the two patches
- 12 fraction of Gaussian curvature at the interface that is above 80th percentile for the cell
- 13 fraction of Gaussian curvature at the interface that is below 20th percentile for the cell
- 14 fraction of Gaussian curvature at the interface that is above 80th percentile for the two patches
- 15 fraction of Gaussian curvature at the interface that is below 20th percentile for the two patches
- 16 fraction of mean curvature at the interface that is above 90th percentile for the cell
- 17 fraction of mean curvature at the interface that is below 10th percentile for the cell
- 18 twice interface length / (perimeter patch 1 + perimeter patch 2)
- 19 difference in the averages of the mean curvature for the two patches
- 20 difference in the maxima of the mean curvature for the two patches
- 21 difference in the (patch closure surface area) / (patch perimeter)<sup>2</sup> for the two patches
- 22 difference in the (patch volume) / (patch surface area)<sup>1.5</sup> for the two patches
- 23 difference in the (patch volume) / (patch closure surface area)<sup>1.5</sup> for the two patches
- 24 average of the averages of the mean curvature for the two patches
- 25 average of the maxima of the mean curvature for the two patches
- 26 average of the (patch closure surface area) / (patch perimeter)<sup>2</sup> for the two patches
- 27 average of the (patch volume) / (patch surface area)<sup>1.5</sup> for the two patches
- 28 average of the (patch volume) / (patch closure surface area)<sup>1.5</sup> for the two patches
- 29 fraction of the interface that is ridged
- 30 fraction of the interface that is very ridged
- 31 fraction of the interface that is valley-like
- 32 fraction of the interface that is very valley-like
- 33 fraction of the interface that is domed
- 34 fraction of the interface that is cratered
- 35 fraction of the interface that is flat
- 36 fraction of the interface that is saddle-like

### Supplementary Table 2

Geometric features of adjacent patch pairs used for SVM-based patch merging.

## Distinguishing Features

### Blebs vs. Non-Blebs

- 1 patch volume / (patch closure surface area)<sup>3/2</sup>
- 2 average of mean curvature on patch edge

### Filopodia vs. Non-Filopodia

- 1 |patch closure center – average patch position|
- 2 patch surface area
- 3 |weighted average patch position – average patch position| / patch radius
- 4 patch surface area / patch closure surface area
- 5 cell volume
- 6 average of mean curvature on patch edge
- 7 patch perimeter

### Lamellipodia vs. Non-Lamellipodia

- 1 |patch closure center – average patch position|
- 2 patch volume
- 3 |weighted average patch position – average patch position| / patch radius
- 4 patch radius / (patch surface area)<sup>1/2</sup>

## Supplementary Table 3

Geometric patch features that best distinguish morphological motifs from non-motifs.

|                          | <b>Feature Selection Iterations</b> | <b>Precision</b> | <b>Recall</b> | <b>F<sub>1</sub></b> |
|--------------------------|-------------------------------------|------------------|---------------|----------------------|
| Linear SVM               | 0                                   | 0.904            | 0.965         | 0.934                |
| Linear SVM               | 1                                   | 0.917            | 0.955         | 0.936                |
| Linear SVM               | 10                                  | 0.913            | 0.960         | 0.936                |
| Radial SVM               | 1                                   | 0.924            | 0.874         | 0.898                |
| Radial SVM               | 10                                  | 0.926            | 0.949         | 0.937                |
| Random forest, 30 trees  | 0                                   | 0.950            | 0.938         | 0.944                |
| Random forest, 300 trees | 0                                   | 0.949            | 0.939         | 0.944                |
| Random forest, 30 trees  | 1                                   | 0.950            | 0.938         | 0.944                |
| Random forest, 30 trees  | 10                                  | 0.954            | 0.925         | 0.939                |

**Supplementary Table 4**

The precision, recall, and F<sub>1</sub> score of various machine-learning models used for filopodia detection on 13 HBEC cells.

| Dataset       |                   |             |                   | Deconvolution parameters |        |             | Surface extraction parameters |              |             |             |                            |               |              |
|---------------|-------------------|-------------|-------------------|--------------------------|--------|-------------|-------------------------------|--------------|-------------|-------------|----------------------------|---------------|--------------|
|               |                   |             |                   |                          |        |             | mode <i>one</i> parameters    |              |             |             | mode <i>two</i> parameters |               |              |
| cell          | label             | scope       | motif             | mode                     | param. | apo. height | mode                          | image smooth | image gamma | mesh smooth | inside gamma               | dilate radius | erode radius |
| dendritic     | Lifect            | meSPIM      | lamellipodia      | Wiener                   | 0.018  | 0.06        | three                         | 0            | 1           | 6           | 0.6                        | 5             | 6.5          |
| melanoma      | tractin           | meSPIM      | blebs             | Wiener                   | 0.018  | 0.04        | one                           | 0            | 1           | 0           |                            |               |              |
| HBEC          | tractin           | meSPIM      | filopodia         | Wiener                   | 0.015  | 0           | one                           | 0.6          | 1           | 0           |                            |               |              |
| melanoma      | Kras              | meSPIM      | blebs             | Wiener                   | 0.018  | 0.06        | one                           | 0            | 0.7         | 0           |                            |               |              |
| melanoma      | PIP <sub>2</sub>  | meSPIM      | blebs             | Wiener                   | 0.018  | 0.06        | two                           | 0            | 0.7         | 0           | 0.6                        | 4             | 6            |
| melanoma      | tractin           | meSPIM      | blebs & filopodia | Wiener                   | 0.015  | 0           | one                           | 0.6          | 1           | 2           |                            |               |              |
| melanoma      | tractin           | meSPIM      | filopodia         | Wiener                   | 0.015  | 0           | one                           | 0.6          | 1           | 2           |                            |               |              |
| U2OS          | tractin           | meSPIM      | blebs             | RL                       | 8      | 0.08        | two                           | 0            | 0.5         | 0           | 0.6                        | 5             | 6            |
| melanoma      | PI3K              | ASLM        | blebs             | RL                       | 7      | 0.06        | two                           | 0            | 0.7         | 0           | 0.6                        | 4             | 6            |
| melanoma      | tractin           | confocal    | blebs             | RL                       | 10     | 0           | two                           | 1            | 0.6         | 6           | 0.6                        | 5             | 6            |
| microglia     | P2Y12             | light sheet | extensions        | RL                       | 10     | 0.06        | three                         | 0            | 1           | 6           | 0.5                        | 5             | 6.5          |
| melanoma      | cytosol           | ASLM        | blebs             | RL                       | 10     | 0.04        | one                           | 0            | 1           | 6           |                            |               |              |
| T cell        | Lifect            | lattice     | lamellipodia      | RL                       | 10     | 0.06        | three                         | 0            | 0.8         | 6           | 0.3                        | 5             | 6            |
| breast cancer | CAAX              | AO lattice  | extensions        | none                     |        |             | one                           | 0.8          | 0.45        | 30          |                            |               |              |
| melanoma      | cytosol & tractin | meSPIM      | blebs             | Wiener                   | auto   | 0.055       | one                           | 0            | 1           | 0           |                            |               |              |
| melanoma      | cytosol           | meSPIM      | blebs             | Wiener                   | auto   | 0.04        | one                           | 0            | 1           | 0           |                            |               |              |

**Supplementary Table 5**

**Deconvolution and surface extraction parameters for all described datasets.**

In the deconvolution parameters section, RL refers to Richardson-Lucy deconvolution. For Wiener deconvolution, the *param* column shows the Wiener parameter, whereas for Richardson-Lucy deconvolution it shows the number of iterations. In the surface extraction parameters section, in mode *one* an isosurface is created directly from the Otsu-normalized deconvolved image, in mode *two*, it is created from the combination of the Otsu-normalized image and an “inside” image, and in mode *three*, it is created from the combination of the Otsu-normalized image, an “inside” image, and a surface filtered image.

## Features Selected

### User 1

patch radius / (patch surface area)<sup>1/2</sup>

average of mean curvature on patch edge

patch shape diameter function

|patch closure center – average patch position|

|weighted average patch position – average patch position| / patch radius

|patch closure center – average patch position| / patch radius

|patch closure center – weighted average patch position| / patch radius

cell volume

cell surface area

### User 2

patch closure surface area

patch volume / (patch closure surface area)<sup>3/2</sup>

patch surface area / (patch perimeter)<sup>2</sup>

patch shape diameter function

average of mean curvature on patch

average of mean curvature on patch edge

### User 3

patch closure surface area

patch radius / (patch surface area)<sup>1/2</sup>

maximum mean curvature on patch

|patch closure center – average patch position|

## Supplementary Table 6

Automatically selected features for bleb detection models generated from three different users training on the same four cells.
